# Supplementary material for: Catalytic Acetone Oxidation over MnOx Catalysts: Regulating Their Crystal Structures and Surface Properties
Source: MDPI journal article supplement (doi:10.3390/pr12020326), 2024-02-02
Supplement: s1 [file s1]

# Catalytic Acetone Oxidation over MnO<sub>x</sub> Catalysts: Regulating Their Crystal Structures and Surface Properties

Bohang Cai, Fawei Lin \*, Xuan Guo and Yongtao Li

Tianjin Key Lab of Biomass/Wastes Utilization, School of Environmental Science and Engineering,  
Tianjin University, Tianjin 300072, China; caibohang@tju.edu.cn (B.C.); guoxuan127@tju.edu.cn (X.G.);  
li1686865620\_@tju.edu.cn (Y.L.)

\* Correspondence: linfawei@tju.edu.cn; Tel.: +86-022-87401929

**Table S1.** Catalytic activity for acetone oxidation over various catalysts of previous research.

| Catalysts                                            | GHSV (mL g <sub>cat</sub> <sup>-1</sup> h <sup>-1</sup> ) | Activity (T <sub>90</sub> , °C) | Reference |
|------------------------------------------------------|-----------------------------------------------------------|---------------------------------|-----------|
| CuCo <sub>2</sub> O <sub>4</sub>                     | 93,000                                                    | 183                             | 1         |
| Cu <sub>0.5</sub> -NFs                               | 79,000                                                    | 225                             | 2         |
| 10V-TiC                                              | 72,000                                                    | 292                             | 3         |
| MnO <sub>2</sub> -WN                                 | 60,000                                                    | 132                             | This work |
| Pt <sub>1.9nm</sub> /TiO <sub>2</sub>                | 40,000                                                    | 207                             | 4         |
| CeO <sub>2</sub> -Pt/TiO <sub>2</sub>                | 40,000                                                    | 245                             | 5         |
| Au-Pd/α-MnO <sub>2</sub>                             | 40,000                                                    | 180                             | 6         |
| CoAlO-C-Mn-30                                        | 33,000                                                    | 173                             | 7         |
| 0.8Pt-G/@Zr                                          | 30,000                                                    | 210                             | 8         |
| Pd <sub>0.01</sub> Mn <sub>0.2</sub> /Ti             | 30,000                                                    | 259                             | 9         |
| GdMn <sub>2</sub> O <sub>5</sub>                     | 24,000                                                    | 160                             | 10        |
| CeO <sub>2</sub> /Co <sub>3</sub> O <sub>4</sub>     | 18,600                                                    | 180                             | 11        |
| CuMn <sub>2</sub> O <sub>x</sub>                     | 18,000                                                    | 150                             | 12        |
| Co <sub>3</sub> O <sub>4</sub> @MnO <sub>x</sub> NFs | 17,000                                                    | 177                             | 13        |
| 12CoCu-R                                             | 6,000                                                     | 195                             | 14        |

## References

- Zhang, C.; Wang, J. G.; Yang, S. F.; Liang, H.; Men, Y., Boosting total oxidation of acetone over spinel MCo<sub>2</sub>O<sub>4</sub> (M = Co, Ni, Cu) hollow mesoporous spheres by cation-substituting effect. *Journal of Colloid and Interface Science* **2019**, 539, 65-75.
- Qin, R.; Chen, J. H.; Gao, X.; Zhu, X. B.; Yu, X. N.; Cen, K. F., Catalytic oxidation of acetone over CuCeO<sub>x</sub> nanofibers prepared by an electrospinning method. *RSC Adv.* **2014**, 4, (83), 43874-43881.
- Chen, J. H.; Yu, X. N.; Zhu, X. C.; Zheng, C. H.; Gao, X.; Cen, K. F., Electrospinning synthesis of vanadium-TiO<sub>2</sub>-carbon composite nanofibrous membranes as effective catalysts for the complete oxidation of low-concentration acetone. *Appl. Catal., A* **2015**, 507, 99-108.
- Song, R. Z.; Bai, Y.; Li, X. R.; Zhu, J. L.; Zhang, H. X.; Shi, Y. C.; Li, K.; Wang, B.; Zhang, H. S.; Yang, Y. F.; Zhang, Z. J., Plasma Circular RNA DYM Related to Major Depressive Disorder and Rapid Antidepressant Effect Treated by Visual Cortical Repetitive Transcranial Magnetic Stimulation. *Journal of Affective Disorders* **2020**, 274, 486-493.

5. Wang, Z. W.; Li, S.; Xie, S. H.; Liu, Y. X.; Dai, H. X.; Guo, G. S.; Deng, J. G., Supported ultralow loading Pt catalysts with high H<sub>2</sub>O-, CO<sub>2</sub>-, and SO<sub>2</sub>-resistance for acetone removal. *Applied Catalysis a-General* **2019**, 579, 106-115.
6. Xia, Y. S.; Xia, L.; Liu, Y. X.; Yang, T.; Deng, J. G.; Dai, H. X., Concurrent catalytic removal of typical volatile organic compound mixtures over Au-Pd/ $\alpha$ -MnO nanotubes. *Journal of Environmental Sciences* **2018**, 64, 276-288.
7. Zhao, Q.; Liu, Q.; Song, C.; Ji, N.; Ma, D.; Lu, X., Enhanced catalytic performance for VOCs oxidation on the CoAlO oxides by KMnO<sub>4</sub> doped on facile synthesis. *Chemosphere* **2019**, 218, 895-906.
8. Kondratowicz, T.; Drozdek, M.; Michalik, M.; Gac, W.; Gajewska, M.; Kustrowski, P., Catalytic activity of Pt species variously dispersed on hollow ZrO<sub>2</sub> spheres in combustion of volatile organic compounds. *Applied Surface Science* **2020**, 513.
9. Zhao, Q.; Ge, Y. L.; Fu, K. X.; Zheng, Y. F.; Liu, Q. L.; Song, C. F.; Ji, N.; Ma, D. G., Catalytic performance of the Pd/TiO<sub>2</sub> modified with MnO<sub>x</sub> catalyst for acetone total oxidation. *Applied Surface Science* **2019**, 496.
10. Dong, A. Q.; Gao, S.; Wan, X.; Wang, L. X.; Zhang, T.; Wang, L.; Lang, X. Y.; Wang, W. C., Labile oxygen promotion of the catalytic oxidation of acetone over a robust ternary Mn-based mullite GdMn<sub>2</sub>O<sub>5</sub>. *Appl. Catal. B-Environ.* **2020**, 271.
11. Zheng, Y. F.; Zhao, Q.; Shan, C. P.; Lu, S. C.; Su, Y.; Han, R.; Song, C. F.; Ji, N.; Ma, D. G.; Liu, Q. L., Enhanced Acetone Oxidation over the CeO<sub>2</sub>/Co<sub>3</sub>O<sub>4</sub> Catalyst Derived from Metal-Organic Frameworks. *Acs Applied Materials & Interfaces* **2020**, 12, (25), 28139-28147.
12. Wang, L.; Sun, Y.; Zhu, Y.; Zhang, J.; Ding, J.; Gao, J.; Ji, W.; Li, Y.; Wang, L.; Ma, Y., Revealing the mechanism of high water resistant and excellent active of CuMn oxide catalyst derived from Bimetal-Organic framework for acetone catalytic oxidation. *Journal of Colloid and Interface Science* **2022**, 622, 577-590.
13. Zhao, Q.; Zheng, Y.; Song, C.; Liu, Q.; Ji, N.; Ma, D.; Lu, X., Novel monolithic catalysts derived from in-situ decoration of Co<sub>3</sub>O<sub>4</sub> and hierarchical Co<sub>3</sub>O<sub>4</sub>@MnO<sub>x</sub> on Ni foam for VOC oxidation. *Applied Catalysis B: Environmental* **2020**, 265, 118552.
14. Zheng, Y.; Su, Y.; Pang, C.; Yang, L.; Song, C.; Ji, N.; Ma, D.; Lu, X.; Han, R.; Liu, Q., Interface-Enhanced Oxygen Vacancies of CoCuO<sub>x</sub> Catalysts In Situ Grown on Monolithic Cu Foam for VOC Catalytic Oxidation. *Environmental Science & Technology* **2022**, 56, (3), 1905-1916.
